# Supplementary material for: Microplastic prevalence in marine fish from onshore Beibu Gulf, South China Sea
Source: Frontiers journal article supplement (doi:10.3389/fmars.2022.964461), 2022-07-22
Supplement: Table_1.XLSX [file Table_1.XLSX]

## Sheet: Sheet1
Table S1
Fish Species	Abbreviation	Living habitat	Feeding habitat	Body length (cm)	Body weight (g)	Fish Samples (N)	Total MPs (N)	MP abundance (items/individual)	MP Distribution (N)			MP Shape			MP Color							MP Size (um)
									Gill	GIT	Totals	Fiber	Fragment	Film	Red	Black	Yellow	Green	Blue	White	Transparent	20-1000	1000-2000	2000-3000	3000-4000	4000-5000
Atropus atropos	AA	pelagic	carnivorous	12.8	27.05	1	1	1	1	0	1	1	0	0	0	0	0	0	0	0	1	0	0	0	1	0
Argyrosomus macrocephalus	AM	benthic	carnivorous	11.1±2.72	60.67±15.22	57	30	0.53	11	19	30	30	0	0	2	12	1	5	8	0	2	23	4	3	0	0
Apogonichthys perdix	AP	benthic	omnivorous	7.3	8.71	2	2	1	0	2	2	2	0	0	0	1	0	0	1	0	0	1	1	0	0	0
Argyrosomus pawak	ARP	benthic	carnivorous	15	41.89	1	0	0	0	0	0	0	0	0	0	0	0	0	0	0	0	0	0	0	0	0
Argyrosomus sp.	AS	benthic	carnivorous	13.2±2.10	30.82±15.84	12	7	0.58	2	5	7	7	0	0	4	1	0	0	1	0	1	2	1	4	0	0
Branchiostegus argentatus	BA	pelagic	carnivorous	11.2	12.34	1	0	0	0	0	0	0	0	0	0	0	0	0	0	0	0	0	0	0	0	0
Cryptocentrus filifer	CF	benthic	omnivorous	11.6±1.92	9.20±4.09	13	8	0.61	4	4	8	8	0	0	2	2	0	0	3	0	1	3	5	0	0	0
Chorinemus sp.	CH	pelagic	carnivorous	21.5	114.11	2	2	1	0	0	0	0	0	0	0	0	0	0	0	0	0	0	0	0	0	0
Chorinemus moadetta	CHM	benthic	carnivorous	12.4±1.22	37.81±9.09	1	0	0	24	45	69	69	0	0	8	14	3	4	20	0	20	43	21	4	0	1
Centrobergx lineatus	CL	pelagic	carnivorous	5.7±1.10	3.85±1.98	28	69	2.46	0	1	1	1	0	0	0	1	0	0	0	0	0	0	1	0	0	0
Carangoides malabaricus	CM	benthic	carnivorous	10.9±1.34	7.39±1.99	4	1	0.25	0	1	1	1	0	0	0	0	0	0	0	0	1	1	0	0	0	0
Callionymus richardsoni	CR	benthic	carnivorous	18.5±1.63	59.87±20.34	4	1	0.25	16	8	24	20	2	2	2	5	0	0	6	3	8	18	4	2	0	0
Cathorops steindachneri	CS	pelagic	carnivorous	16.2	24.81	13	24	1.85	2	0	2	1	1	0	1	0	0	0	1	0	0	2	0	0	0	0
Cynoglossus ropsi	CY	benthic	omnivorous	17.9±1.66	22.84±8.93	9	2	0.22	1	1	2	2	0	0	0	1	0	0	1	0	0	2	0	0	0	0
Drepane punctata	DP	benthic	carnivorous	15.5	106.52	1	1	1	0	1	1	1	0	0	1	0	0	0	0	0	0	0	0	1	0	0
Formio niger	FN	pelagic	carnivorous	12.4±0.25	38.01±4.78	3	1	0.33	1	0	1	1	0	0	0	0	0	0	1	0	0	1	0	0	0	0
Grammoplites scaber	GS	benthic	carnivorous	13.5±3.19	18.66±13.91	18	30	1.67	25	5	30	30	0	0	4	9	1	2	3	2	9	16	8	4	2	0
Leiognathus berbis	LB	benthic	carnivorous	7.3±1.08	5.29±2.30	22	13	0.59	6	7	13	13	0	0	1	2	0	1	3	0	6	8	2	2	1	0
Minous inermis	MI	benthic	carnivorous	12.3±1.88	30.91±11.80	7	7	1	6	1	7	7	0	0	0	2	1	1	3	0	0	6	1	0	0	0
Nemipterus japonicus	NJ	benthic	carnivorous	14.8	48.44	2	0	0	0	0	0	0	0	0	0	0	0	0	0	0	0	0	0	0	0	0
Scatophagus argus	SA	benthic	omnivorous	15.4±3.86	101.95±63.04	3	6	2	4	2	6	6	0	0	0	2	0	0	3	0	1	4	2	0	0	0
Synechogobius ommaturus	SO	benthic	carnivorous	10.4±2.31	11.68±6.53	11	4	0.36	2	2	4	4	0	0	0	2	0	1	1	0	0	3	1	0	0	0
Sillago sihama	SS	pelagic	omnivorous	14.6	23.46	2	8	4	3	5	8	7	1	0	1	1	2	0	2	0	2	6	2	0	0	0
Triaenopogon barbatus	TB	benthic	carnivorous	9.8	5.42	1	0	0	0	0	0	0	0	0	0	0	0	0	0	0	0	0	0	0	0	0
Thryssa dussumieri	TD	pelagic	carnivorous	8.7±0.55	8.77±1.83	8	0	0	0	0	0	0	0	0	0	0	0	0	0	0	0	0	0	0	0	0
Thryssa hamiltonii	TH	pelagic	carnivorous	15.5±3.03	30.17±16.48	7	6	0.86	4	2	6	6	0	0	0	3	0	1	2	0	0	4	1	1	0	0
Terapon jarbua	TJ	benthic	omnivorous	8.9±1.75	8.68±4.08	4	1	0.25	0	1	1	1	0	0	0	1	0	0	0	0	0	1	0	0	0	0
Takifugu oblongus	TO	benthic	omnivorous	20.1	194.31	1	0	0	0	0	0	0	0	0	0	0	0	0	0	0	0	0	0	0	0	0
Takifugu poecilonotus	TP	benthic	omnivorous	19	164.71	1	0	0	0	0	0	0	0	0	0	0	0	0	0	0	0	0	0	0	0	0
Trachinotus ovatus	TRO	pelagic	carnivorous	24	219.66	1	0	0	0	0	0	0	0	0	0	0	0	0	0	0	0	0	0	0	0	0
Terapon theraps	TT	pelagic	carnivorous	10.5±0.44	17.97±2.71	11	8	0.73	0	8	8	8	0	0	0	1	2	1	1	2	1	4	3	1	0	0
Upeneus sulphureus	US	benthic	carnivorous	11.6±1.38	20.01±7.08	20	18	0.9	2	16	18	18	0	0	0	2	1	1	0	0	14	16	2	0	0	0
					Total	271	250	1.02 ± 0.18	114	136	250	244	4	2	26	62	11	17	60	7	67	164	59	22	4	1
